# Supplementary material for: Sympathetic neurons are a powerful driver of myocyte function in cardiovascular disease
Source: PubMed Central journal article supplement (PMC5155272; doi:10.1038/srep38898), 2016-12-14
Supplement: srep38898-s2.pdf [file srep38898-s2.pdf]

Supplementary information file for the supplementary video S1 in the following manuscript.

## **Sympathetic neurons are a powerful driver of myocyte function in cardiovascular disease.**

Hege E. Larsen<sup>1,2</sup>, Konstantinos Lefkimmiatis<sup>2</sup>, David J. Paterson<sup>1,2\*</sup>

<sup>1</sup>*OXION Initiative in Ion Channels and Disease*, Sherrington Building, University of Oxford, Oxford OX1 3PT

<sup>2</sup>Burdon Sanderson Cardiac Science Center, Department of Physiology, Anatomy and Genetics, University of Oxford, UK.

\* Corresponding author

### **Supplementary video S1**

The supplementary video S1 titled “Real time, phase contrast video of a WKYnWKYm culture on day five post culturing” was recorded on an Olympus microscope (20x lens) coupled to a Cool Snap CCD camera. The video depicts the real time beating behavior of a co-culture of sympathetic stellate neurons and neonatal ventricular myocytes. The width of the video image is 1 mm. The neuron, whose cell body measures 40  $\mu$ M is positioned left of the center of the screen.

The full figure legend reads: Real time, phase contrast video of a WKYnWKYm culture on day five post culturing. Note how the sympathetic neuron (middle of the view) branches out and innervates the layer of myocytes.
